# Supplementary material
Source: publisher site journal article supplement (https://www.spandidos-publications.com/7696/downloadSupplementary)

Figure S1. Prognostic gene results when the threshold is >0.5. (A) Forest plot of five prognostic genes. (B) Kaplan-Meier survival curve showing the survival of patients in the high- and low-risk groups. (C) Receiver operating characteristic curve evaluating the performance of the prognostic model. HR, hazard ratio; CI, confidence interval; FPR, false-positive rate; TPR, true-positive rate; AUC, area under the curve. VPS13D, vacuolar protein sorting 13 homolog D; PREPL, prolyl endopeptidase-like; LIPT1, lipoyltransferase 1.

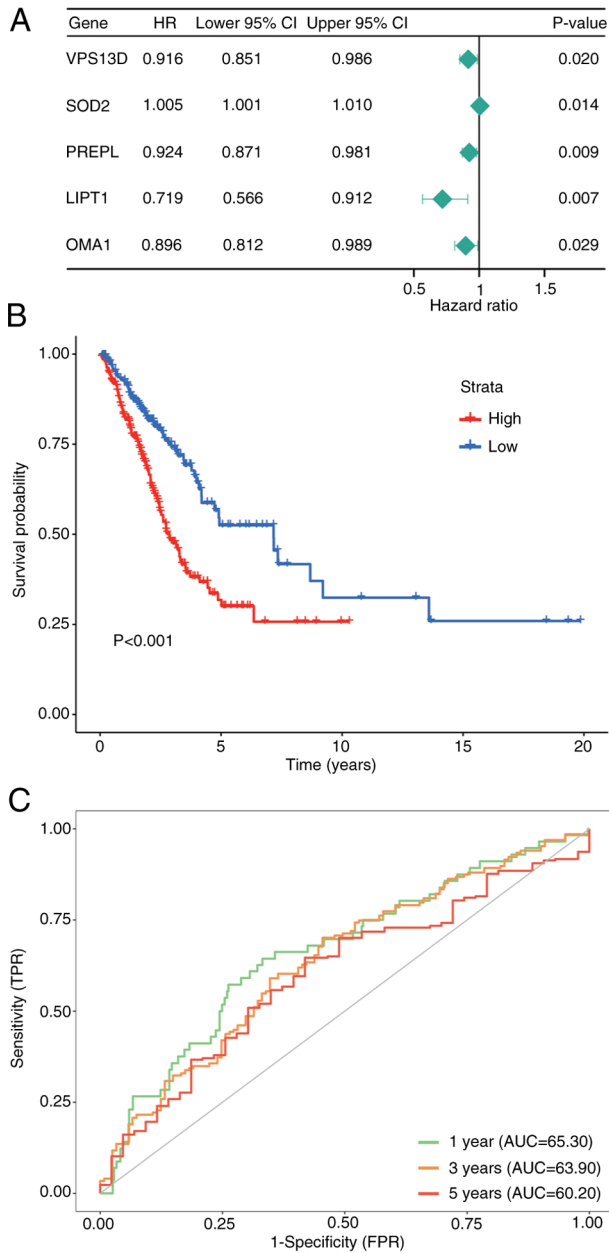

Supplement: Supplementary file 1 [file downloadSupplementary]
